# Supplementary material for: In Silico Identification and Clinical Validation of a Novel Long Non-Coding RNA/mRNA/miRNA Molecular Network for Potential Biomarkers for Discriminating SARS CoV-2 Infection Severity
Source: MDPI journal article supplement (doi:10.3390/cells10113098), 2021-11-09
Supplement: s1 [file s1]

## *Supplementary Material*

### **In silico identification and clinical validation of a Novel Long non-coding RNA/mRNA/ miRNA Molecular network as Potential biomarker for discriminating SARS COV-2 infection severity**

Sara H.A. Agwa<sup>1,\*</sup>, Hesham Elghazaly<sup>2</sup>, Mahmoud Shawky El Meteini<sup>3</sup>, Sherif M. Shawky<sup>1,4,5\*</sup>, Marwa Ali<sup>6</sup>, Aya M. Abd Elsamee<sup>7</sup>, Safa Matbouly Sayed<sup>8</sup>, Nadine Sherif<sup>9</sup>, Howida M. Sharaf<sup>10</sup>, Mohamed A.Alhadidy<sup>11</sup> and Marwa Matboli<sup>12</sup>

- <sup>1</sup> Pathology and Molecular Genomics unit of Medical Ain Shams Research Institute (MASRI), Faculty of Medicine, Ain Shams University, Cairo, 11591, Egypt.  
[sara.h.agwa@med.asu.edu.eg](mailto:sara.h.agwa@med.asu.edu.eg)
  - <sup>2</sup> Oncology Department, Medical Ain Shams Research institute (MASRI), Faculty of Medicine, Ain Shams University, Cairo, 11382, Egypt. [heshamelghazaly@med.asu.edu.eg](mailto:heshamelghazaly@med.asu.edu.eg)
  - <sup>3</sup> Department of General Surgery, the school of Medicine, University of Ain Shams, Cairo, 11591, Egypt; [mahmoud\\_elmeteini@med.asu.edu.eg](mailto:mahmoud_elmeteini@med.asu.edu.eg)
  - <sup>4</sup> Biochemistry Department, Faculty of Pharmacy, Misr University for Science and Technology Al-Motamayez District P.O.BOX: 77, 6th October City, Giza, 12566, Egypt
  - <sup>5</sup> Center of Genomics, Helmy Medical Institute, Zewail City of Science and Technology, Ahmed Zewail Road, October Gardens, 6th of October City, Giza, 12578 Egypt;  
[sshawky@zewailcity.edu.eg](mailto:sshawky@zewailcity.edu.eg)
  - <sup>6</sup> Medicinal Biochemistry and Molecular biology Department, Faculty of Medicine Ain Shams University, 11591, Cairo, Egypt. [drmarwa\\_matboly@med.asu.edu.eg](mailto:drmarwa_matboly@med.asu.edu.eg)
  - <sup>7</sup> Biochemistry and Molecular Genomics Unit of Medical Ain Shams Research Institute (MASRI), Ain Shams University, Cairo, 11591, Egypt; [aya\\_ana2025@yahoo.com](mailto:aya_ana2025@yahoo.com)
  - <sup>8</sup> Pediatric Department, School of Medicine, Ain Shams University Hospitals, Cairo 11566, Egypt; [safamatboly@yahoo.com](mailto:safamatboly@yahoo.com)
  - <sup>9</sup> Undergraduate student, Faculty of Medicine, Ain Shams University, Abbassia, Cairo, 11591 Egypt; [emp17.nadine.s.elzahwy@gmail.com](mailto:emp17.nadine.s.elzahwy@gmail.com)
  - <sup>10</sup> Clinical & molecular pathology, Ain Shams University Hospitals, Cairo, 11591, Egypt  
[howidasharaf@yahoo.com](mailto:howidasharaf@yahoo.com)
  - <sup>11</sup> Department of Anesthesiology, Intensive Care & Pain management, Faculty of Medicine, Ain Shams University, Abbassia, Cairo, 11591, Egypt; [Mohamed\\_alaaeldin@med.asu.edu.eg](mailto:Mohamed_alaaeldin@med.asu.edu.eg)
  - <sup>12</sup> Medicinal Biochemistry and Molecular biology Department, Faculty of medicine, University of Ain Shams, Abbassia, Cairo, Egypt; [drmarwa\\_matboly@med.asu.edu.eg](mailto:drmarwa_matboly@med.asu.edu.eg)
- \* Correspondence: [sara.h.agwa@med.asu.edu.eg](mailto:sara.h.agwa@med.asu.edu.eg) (S.H.A.A.); [sshawky@zewailcity.edu.eg](mailto:sshawky@zewailcity.edu.eg) (S.M.S.); [drmarwa\\_matboly@med.asu.edu.eg](mailto:drmarwa_matboly@med.asu.edu.eg) (M.M.)

**Supplementary Table S1: Correlation between IL11RA-molecular network,  
ferritin, procalcitonin and IL11RA protein:**

|                   |                                                  |                         | lncRNA<br>RP11-<br>773H22.<br>4 | HSA-MIR-<br>4257 | IL11RA<br>mRNA | IL11RA<br>protein<br>(pg/mL) | Procalciton<br>in protein<br>(pg/mL ) | Ferritin<br>(ng/ml) |
|-------------------|--------------------------------------------------|-------------------------|---------------------------------|------------------|----------------|------------------------------|---------------------------------------|---------------------|
| Spearman's<br>Rho | Relative quantity<br>of lncRNA RP11-<br>773H22.4 | Correlation Coefficient | 1.000                           | -.475**          | .530**         | .497**                       | .210**                                | .389**              |
|                   |                                                  | Sig. (2-tailed)         | .                               | .000             | .000           | .000                         | .003                                  | .000                |
|                   | Relative quantity<br>of HSA-MIR-<br>4257         | Correlation Coefficient | -.475**                         | 1.000            | -.664**        | -.607**                      | -.327**                               | -.538**             |
|                   |                                                  | Sig. (2-tailed)         | .000                            | .                | .000           | .000                         | .000                                  | .000                |
|                   | Relative quantity<br>of IL11RA<br>mRNA           | Correlation Coefficient | .530**                          | -.664**          | 1.000          | .838**                       | .449**                                | .511**              |
|                   |                                                  | Sig. (2-tailed)         | .000                            | .000             | .              | .000                         | .000                                  | .000                |
|                   | IL11RA<br>protein(pg/mL)                         | Correlation Coefficient | .497**                          | -.607**          | .838**         | 1.000                        | .482**                                | .544**              |
|                   |                                                  | Sig. (2-tailed)         | .000                            | .000             | .000           | .                            | .000                                  | .000                |
|                   | Procalcitonin<br>protein(pg/mL)                  | Correlation Coefficient | .210**                          | -.327**          | .449**         | .482**                       | 1.000                                 | .264**              |
|                   |                                                  | Sig. (2-tailed)         | .003                            | .000             | .000           | .000                         | .                                     | .000                |
|                   | Ferritin(ng/ml)                                  | Correlation Coefficient | .389**                          | -.538**          | .511**         | .544**                       | .264**                                | 1.000               |
|                   |                                                  | Sig. (2-tailed)         | .000                            | .000             | .000           | .000                         | .000                                  | .                   |

\*\* . Correlation is significant at the 0.01 level (2-tailed)

## Supplementary figures

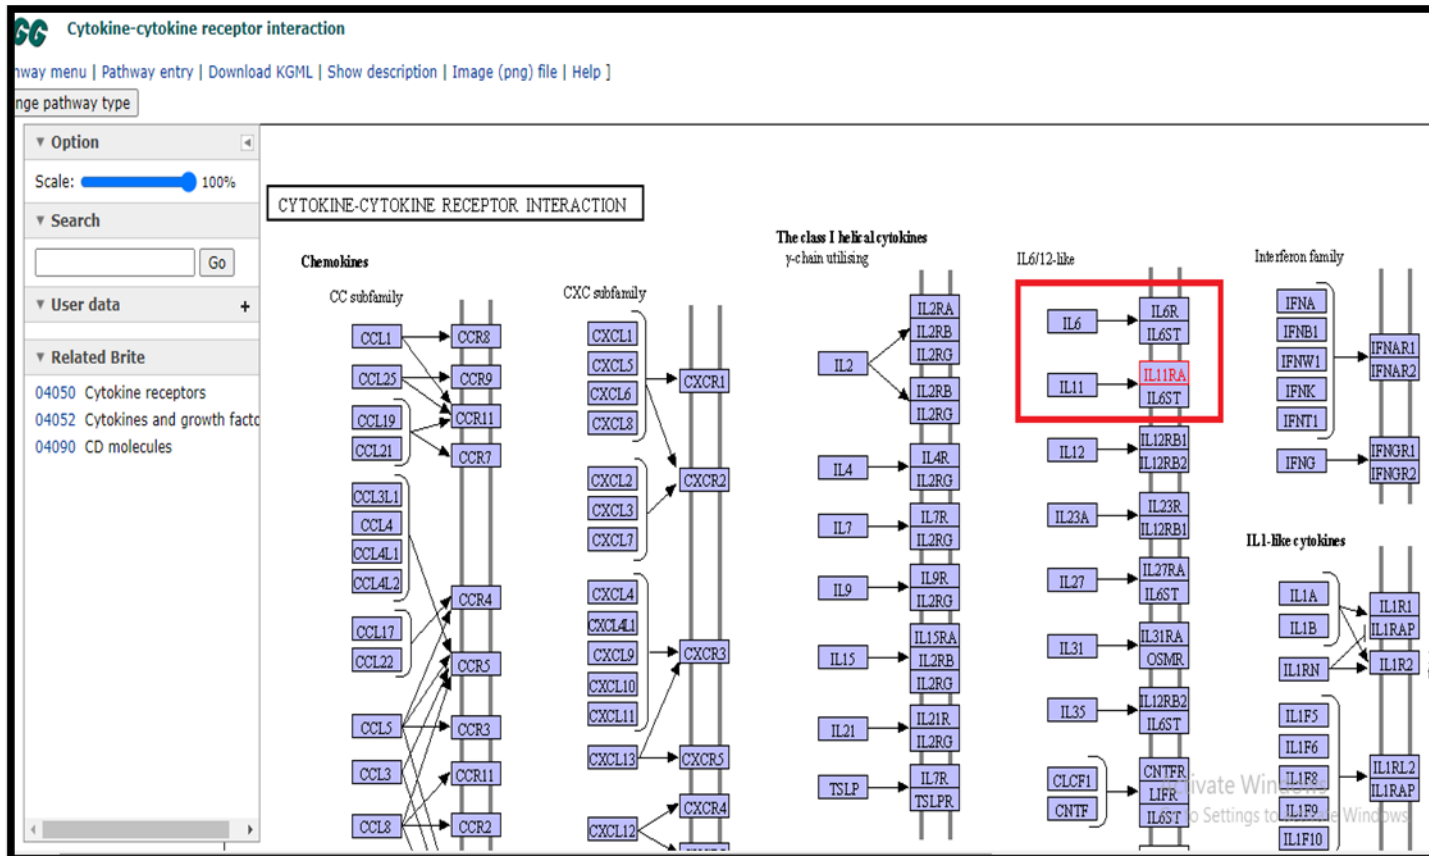

**Supplementary figure S1:** KEGG ontology pathway database revealed that IL11RA interacts with IL6ST in cytokine signaling and cytokine-cytokine interaction pathway including IL11RA gene interacting with IL6ST. Available at (<https://www.genome.jp/kegg/pathway.html>)

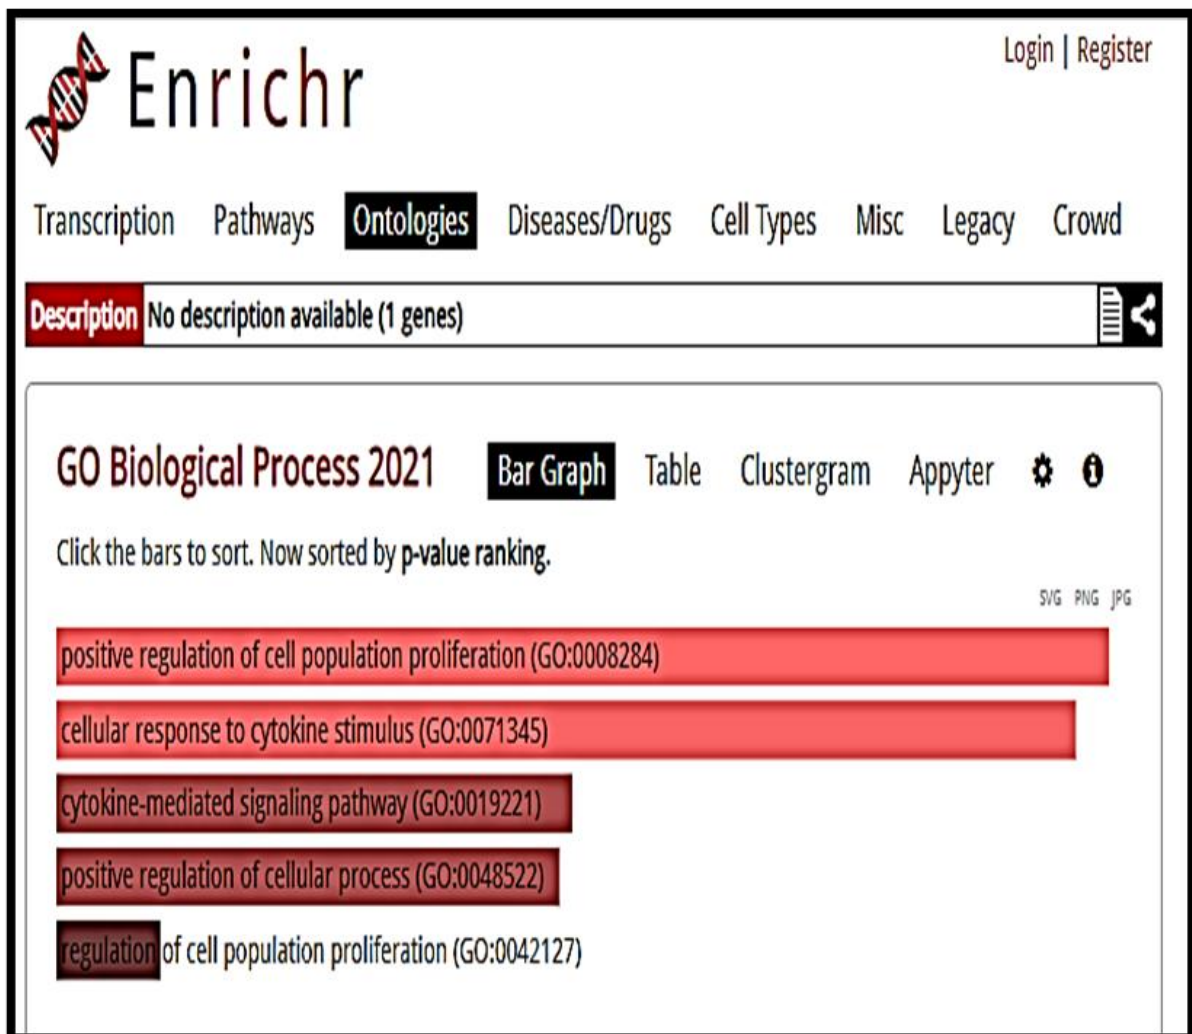

**Supplementary figure S2:** Showing gene ontology of IL11RA mRNA which is involved in cellular response to cytokine stimulus and involved in cytokine mediated signaling pathway that was retrieved from Enrichr tool.

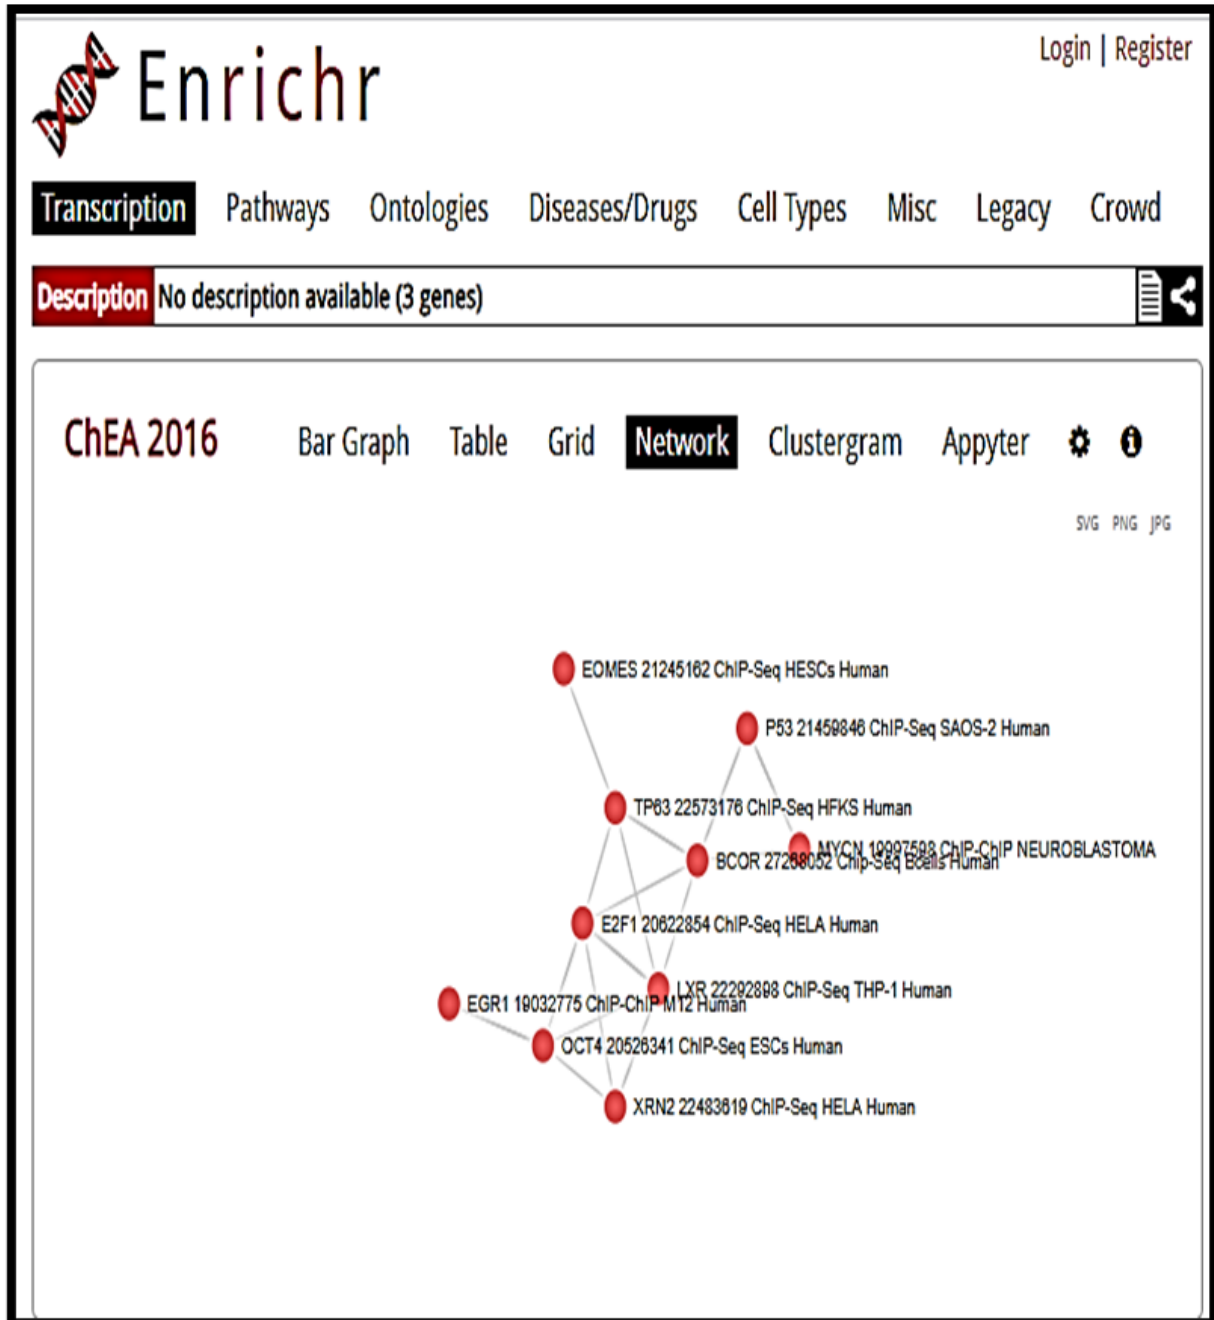

**Supplementary figure S3:** Showing the interaction between IL11RA mRNA, hsa-miR-4257 miRNA and lncRNA RP11-773H22.4 lncRNA that was retrieved from enricher tool

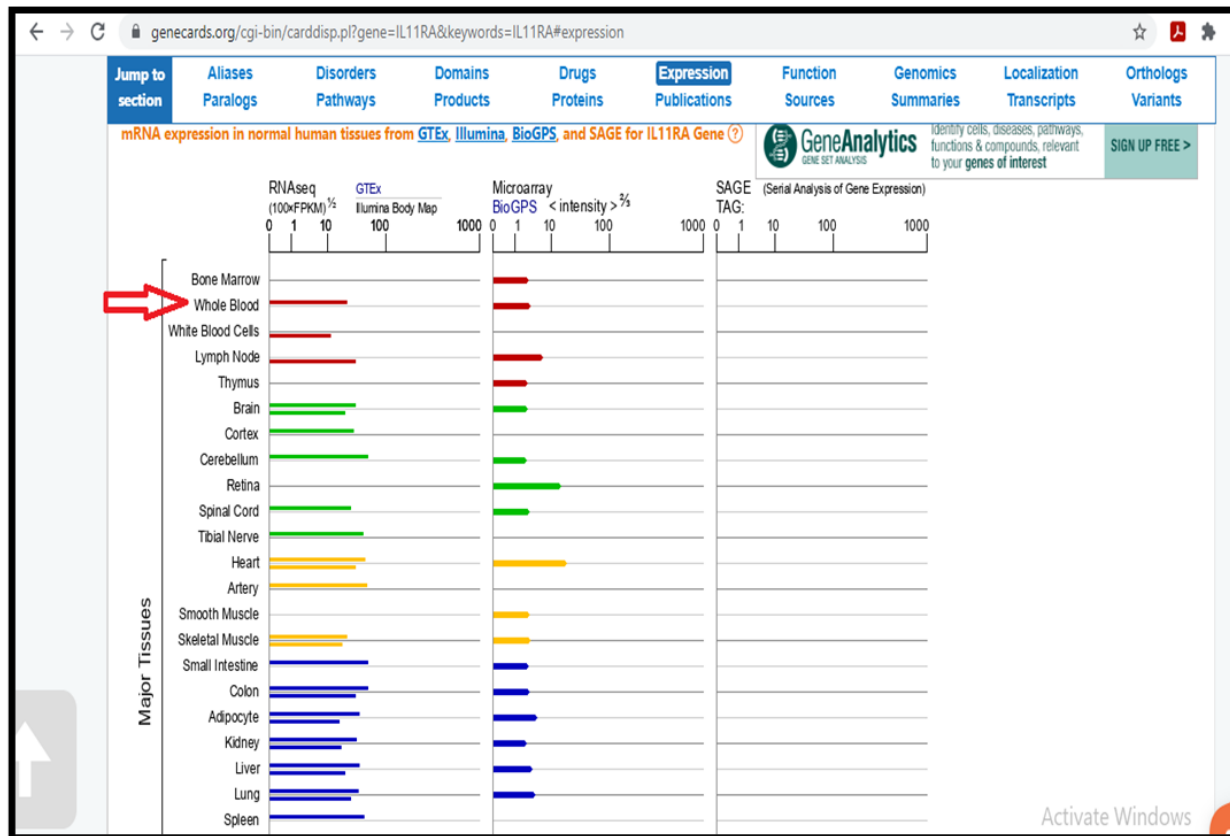

**Supplementary figure S4:** Showing gene expression of IL11RA mRNA which is expressed in the whole blood that was retrieved from Gene cards database Available at (<https://www.genecards.org/cgi-bin/carddisp.pl?gene=IL11RA&keywords=IL11RA#expression>)

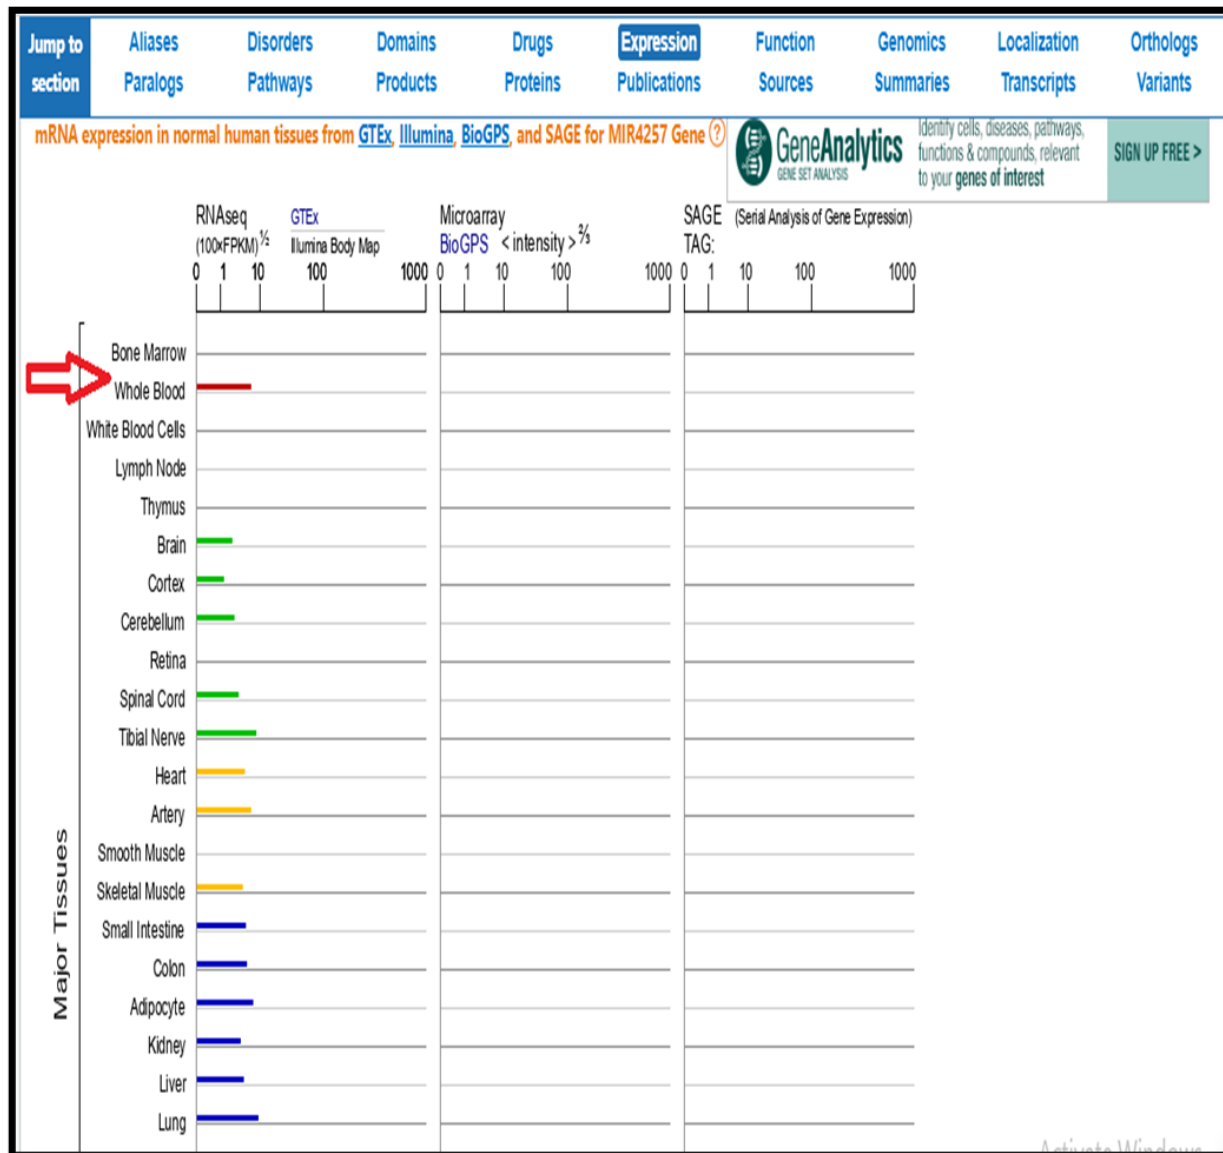

**Supplementary figure S5:** Showing gene expression of miR- 4257 which is expressed in the whole blood that was retrieved from gene card database (<https://www.genecards.org/cgi-bin/carddisp.pl?gene=MIR4257&keywords=hsa%5C-miR%5C-4257> )

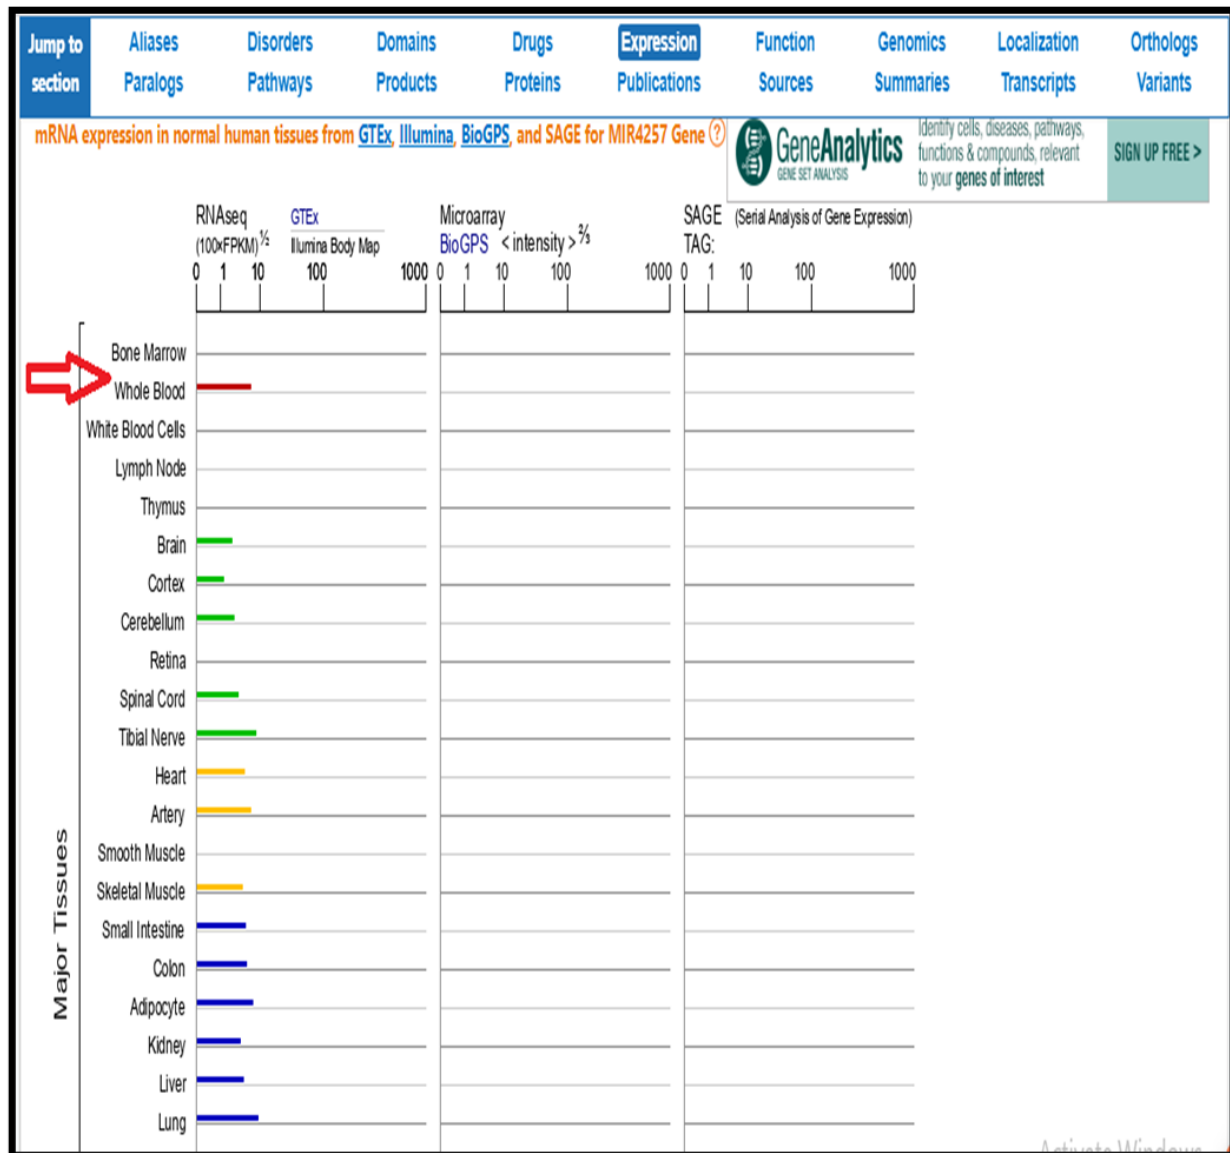

**Supplementary figure S6:** Showing gene expression of lncRNA RP11-773H22.4 which is expressed in the whole blood that was retrieved from gene cards database available at (<https://www.genecards.org/cgi-bin/carddisp.pl?gene=ENSG00000266969&keywords=lnc%5C-PTPN2%5C-6#expression>)



**Gene '3590' is predicted to be targeted by 19 miRNAs in miRDB.**

| Target Detail           | Target Rank | Target Score | miRNA Name                      | Gene Symbol | Gene Description                      |
|-------------------------|-------------|--------------|---------------------------------|-------------|---------------------------------------|
| <a href="#">Details</a> | 1           | 91           | <a href="#">hsa-miR-4753-3p</a> | IL11RA      | interleukin 11 receptor subunit alpha |
| <a href="#">Details</a> | 2           | 77           | <a href="#">hsa-miR-6810-3p</a> | IL11RA      | interleukin 11 receptor subunit alpha |
| <a href="#">Details</a> | 3           | 77           | <a href="#">hsa-miR-6801-3p</a> | IL11RA      | interleukin 11 receptor subunit alpha |
| <a href="#">Details</a> | 4           | 75           | <a href="#">hsa-miR-4696</a>    | IL11RA      | interleukin 11 receptor subunit alpha |
| <a href="#">Details</a> | 5           | 73           | <a href="#">hsa-miR-4257</a>    | IL11RA      | interleukin 11 receptor subunit alpha |
| <a href="#">Details</a> | 6           | 67           | <a href="#">hsa-miR-1226-3p</a> | IL11RA      | interleukin 11 receptor subunit alpha |
| <a href="#">Details</a> | 7           | 66           | <a href="#">hsa-miR-4643</a>    | IL11RA      | interleukin 11 receptor subunit alpha |
| <a href="#">Details</a> | 8           | 62           | <a href="#">hsa-miR-6809-3p</a> | IL11RA      | interleukin 11 receptor subunit alpha |
| <a href="#">Details</a> | 9           | 62           | <a href="#">hsa-miR-603</a>     | IL11RA      | interleukin 11 receptor subunit alpha |
| <a href="#">Details</a> | 10          | 60           | <a href="#">hsa-miR-3941</a>    | IL11RA      | interleukin 11 receptor subunit alpha |
| <a href="#">Details</a> | 11          | 60           | <a href="#">hsa-miR-12123</a>   | IL11RA      | interleukin 11 receptor subunit alpha |
| <a href="#">Details</a> | 12          | 59           | <a href="#">hsa-miR-8485</a>    | IL11RA      | interleukin 11 receptor subunit alpha |
| <a href="#">Details</a> | 13          | 59           | <a href="#">hsa-miR-4717-3p</a> | IL11RA      | interleukin 11 receptor subunit alpha |
| <a href="#">Details</a> | 14          | 58           | <a href="#">hsa-miR-7155-5p</a> | IL11RA      | interleukin 11 receptor subunit alpha |
| <a href="#">Details</a> | 15          | 56           | <a href="#">hsa-miR-519d-5p</a> | IL11RA      | interleukin 11 receptor subunit alpha |
| <a href="#">Details</a> | 16          | 56           | <a href="#">hsa-miR-3678-3p</a> | IL11RA      | interleukin 11 receptor subunit alpha |
| <a href="#">Details</a> | 17          | 56           | <a href="#">hsa-miR-12114</a>   | IL11RA      | interleukin 11 receptor subunit alpha |
| <a href="#">Details</a> | 18          | 54           | <a href="#">hsa-miR-6747-3p</a> | IL11RA      | interleukin 11 receptor subunit alpha |
| <a href="#">Details</a> | 19          | 53           | <a href="#">hsa-miR-5695</a>    | IL11RA      | interleukin 11 receptor subunit alpha |

**Supplementary figure S7:** Showing that IL11RA mRNA is a direct target of miR- 4257 that was retrieved from miRDB database (<http://mirdb.org/>

|                                   | Predicted consequential pairing of target region (top) and miRNA (bottom) | Site type | Context++ score | Context++ score percentile | Weighted context++ score | Conserved branch length | P <sub>CT</sub> |
|-----------------------------------|---------------------------------------------------------------------------|-----------|-----------------|----------------------------|--------------------------|-------------------------|-----------------|
| Position 170-177 of IL11RA 3' UTR | 5' ...CUGAAAGGUGCUUGUACCUCUGA...                                          | 8mer      | -0.44           | 99                         | -0.44                    | 0                       | N/A             |
| hsa-miR-4257                      | 3' GAGUCAGGGUGGAGACC                                                      |           |                 |                            |                          |                         |                 |

**Supplementary figure S8:** Showing that IL11RA mRNA is a direct target of miR- 4257 that was retrieved from targetscan database available at ([http://www.targetscan.org/cgi-bin/targetscan/vert\\_72/view\\_gene.cgi?rs=ENST00000318041.9&taxid=9606&members=miR-4257&showcnc=0&showncf=0&showncf1=1&showncf2=1&subset=1](http://www.targetscan.org/cgi-bin/targetscan/vert_72/view_gene.cgi?rs=ENST00000318041.9&taxid=9606&members=miR-4257&showcnc=0&showncf=0&showncf1=1&showncf2=1&subset=1))

| Input form | Web services                                           | Help & Documentation | Bioinformatics Tools FAQ |
|------------|--------------------------------------------------------|----------------------|--------------------------|
| EMBOSS_001 | 1 -----                                                |                      | 0                        |
| EMBOSS_001 | 301 AGACAGCACTGATGAGGGCACCTACATCTGCCAGACCCTGGATGGTGCAC |                      | 350                      |
| EMBOSS_001 | 1 -----                                                |                      | 0                        |
| EMBOSS_001 | 351 TTGGGGGCACAGTGACCCTGCAGCTGGGCTACCCTCCAGCCCGCCCTGTT |                      | 400                      |
| EMBOSS_001 | 1 -----                                                |                      | 0                        |
| EMBOSS_001 | 401 GTCTCCTGCCAAGCAGCCGACTATGAGAACTTCTCTGCACTTGGAGTCC  |                      | 450                      |
| EMBOSS_001 | 1 -----                                                |                      | 0                        |
| EMBOSS_001 | 451 CAGCCAGATCAGCGGTTTACCCACCCGCTACCTCACCTCCTACAGG--AA |                      | 498                      |
| EMBOSS_001 | 1 -----GGCUUA                                          |                      | 6                        |
| EMBOSS_001 | 499 GAAGACAGT-CCTAGGAGCTGATAGCCAGA----GGAGGAGTCCATCCA  |                      | 542                      |
| EMBOSS_001 | 7 GAA-ACAGUCCCUAGG-----UAG---GAUUUGGGGAGGAG-CUA---A    |                      | 42                       |
| EMBOSS_001 | 543 CAGGGCCCT---GGCCATGCCACAGGATCCCCTAGGGGCTGCCCGCTGT  |                      | 589                      |
| EMBOSS_001 | 43 GAAGCCCUACAGG---GCCCAGAGG-----UGGGGACUGAGC-CUUA     |                      | 81                       |
| EMBOSS_001 | 590 GTTGTCCACGGGGCTGAGTTCTGGAGCCAGTACCGGATTAATGTGACTGA |                      | 639                      |
| EMBOSS_001 | 82 GUUGG-----                                          |                      | 86                       |
| EMBOSS_001 | 640 GGTGAACCCACTGGGTGCCAGCACACGCCTGCTGGATGTGAGCTTGCAGA |                      | 689                      |
| EMBOSS_001 | 87 -----                                               |                      | 86                       |
| EMBOSS_001 | 690 GCATCTTGCGCCCTGACCCACCCAGGGCCTGCGGGTAGAGTCAGTACCA  |                      | 739                      |
| EMBOSS_001 | 87 -----                                               |                      | 86                       |
| EMBOSS_001 | 740 GGTTACCCCGACGCCTGCGAGCCAGCTGGACATACCCTGCCTCCTGGCC  |                      | 789                      |

**Supplementary figure S9:** Showing sequence alignment between IL11RA mRNA and miR-4257 that was performed using European bioinformatics institute database available at ([https://www.ebi.ac.uk/Tools/services/web/toolresult.ebi?jobId=emboss\\_needle-I20210805-231255-0164-87398889-p1m](https://www.ebi.ac.uk/Tools/services/web/toolresult.ebi?jobId=emboss_needle-I20210805-231255-0164-87398889-p1m))

[illegible]

| Query         | Length_Query | Target       | Length_Target | dG     | ndG     | Start_Position_Query | End_Position_Query | Start_Position_Target | End_Position_Target |
|---------------|--------------|--------------|---------------|--------|---------|----------------------|--------------------|-----------------------|---------------------|
| RP11-773H22.4 | 474          | hsa-mir-4257 | 86            | -11.82 | -0.1515 | 3                    | 88                 | 1                     | 86                  |

11



| Input form | Web services                                            | Help & Documentation | Bioinformatics Tools FAQ |
|------------|---------------------------------------------------------|----------------------|--------------------------|
| EMBOSS_001 | 1 -----                                                 |                      | 0                        |
| EMBOSS_001 | 951 CTGGCACCTGGAGCACCTGGAGCCCGAGGCCTGGGGAAGTCCGAGCACT   |                      | 1000                     |
| EMBOSS_001 | 1 -----TTTGAAGCGAGGAAGCCG-----CGCGCCCT                  |                      | 26                       |
| EMBOSS_001 | 1001 GGGACCATACCAAAGGAGATACCAGCATGGGGC-CAGCTACACACGCAGC |                      | 1049                     |
| EMBOSS_001 | 27 G---CGAGTCCGGAGGAGGAA---ATGGAGCTCTG-----CGCTGC       |                      | 61                       |
| EMBOSS_001 | 1050 CAGAGGTGGAGCCTCAGGTGGACAGCCCTGCTCCTCCAAGGCCCTCCCTC |                      | 1099                     |
| EMBOSS_001 | 62 -----GTGGGACC-CGGG-GGACG-----GCTCC-CGTTGGCGCCGCTT    |                      | 98                       |
| EMBOSS_001 | 1100 CAACCACACCCTCGGCTACTTGATCACAGGGACTCTGTGGAGCAGGTAGC |                      | 1149                     |
| EMBOSS_001 | 99 CAA-----GG-----TAAGGGATTAAGAG--GCCGAGA--             |                      | 124                      |
| EMBOSS_001 | 1150 TGTGCTGGCGTCTTTGGGAATCCTTTCTTTCTGGGACTGGTGGCTGGGG  |                      | 1199                     |
| EMBOSS_001 | 125 -GAGATATCGTCTGCGAGGG---TGAGGATACTGGAG--GTTGGCAGTGT  |                      | 168                      |
| EMBOSS_001 | 1200 C--CCTGGCACTGGGGCTCTGGCTGAGGCTGAGACGGGGTGGGAAGGATG |                      | 1247                     |
| EMBOSS_001 | 169 CAGCATCGAAGAGTGCTCTACCAGAGGAGGAGGAGGAGGAGGAAGGAG-   |                      | 217                      |
| EMBOSS_001 | 1248 GATCCCCAAAGCCTGGGTTCTTGGCCTCAGTGATTCCAGTGGACAGGCGT |                      | 1297                     |
| EMBOSS_001 | 218 -----CTGGG--CATAAC-----TGGAC---CAT                  |                      | 236                      |
| EMBOSS_001 | 1298 CCAGGAGCTCCAAACCTGTAGAGGACCCAGGAGGGCTTCGGCAGATTCCA |                      | 1347                     |
| EMBOSS_001 | 237 CT---CGATCCAGCCC-GTGGGGAATCCA-GAGGG-----GATAACA     |                      | 273                      |
| EMBOSS_001 | 1348 CCTATAATTCTGTCTTGCTGGTGTGGATAGAAACAGGCAGGACAGTAGA  |                      | 1397                     |
| EMBOSS_001 | 274 -----AGAGGATA-TAACCA--CAGGACA----A                  |                      | 295                      |

**Supplementary figure S11:** Showing sequence alignment between IL11RA mRNA and RP11-773H22.4 lncRNA that was performed using European bioinformatics institute database available at ([https://www.ebi.ac.uk/Tools/services/web/toolresult.ebi?jobId=emboss\\_needle-l20210805-231838-0992-90221444-p2m](https://www.ebi.ac.uk/Tools/services/web/toolresult.ebi?jobId=emboss_needle-l20210805-231838-0992-90221444-p2m) )

|            |     |                                                    |     |
|------------|-----|----------------------------------------------------|-----|
| EMBOSS_001 | 1   | TTTGAAGCGAGGAAGCCGCGGCCCT--GCGAGTCCGGAGGAGGA--AAT  | 46  |
|            |     | .  ...   . . . .   .  ... .... .     . .  .        |     |
| EMBOSS_001 | 1   | -----GGCUUAGAAACAG---UCCCUAGGUAGGAUUUGGGGAGGAGCUAA | 42  |
| EMBOSS_001 | 47  | GGAGCTCTGCGCTGCGTGGGACCCG----GGGGACGGCTCC--CGTTGGC | 90  |
|            |     | .   .  .. .   .   .      . .. .  ..                |     |
| EMBOSS_001 | 43  | GAAGCCC----CUAC-AGGGCCCAGAGGUGGGACUGAGCCUAGUUGG-   | 86  |
| EMBOSS_001 | 91  | GCCGCCTTCAAGGTAAGGGATTAAGAGGCCGAGAGAGATATCGTCTGCGA | 140 |
| EMBOSS_001 | 87  | -----                                              | 86  |
| EMBOSS_001 | 141 | GGGTGAGGATACTGGAGGTTGGCAGTGTGAGCATCGCAAGAGTGCTCTAC | 190 |

**Supplementary figure S12:** Showing sequence alignment between miR- 4257 miRNA and RP11-773H22.4 lncRNA that was performed using European bioinformatics institute database available at ([https://www.ebi.ac.uk/Tools/services/web/toolresult.ebi?jobId=emboss\\_needle-l20210805-232348-0040-53372138-p2m](https://www.ebi.ac.uk/Tools/services/web/toolresult.ebi?jobId=emboss_needle-l20210805-232348-0040-53372138-p2m))

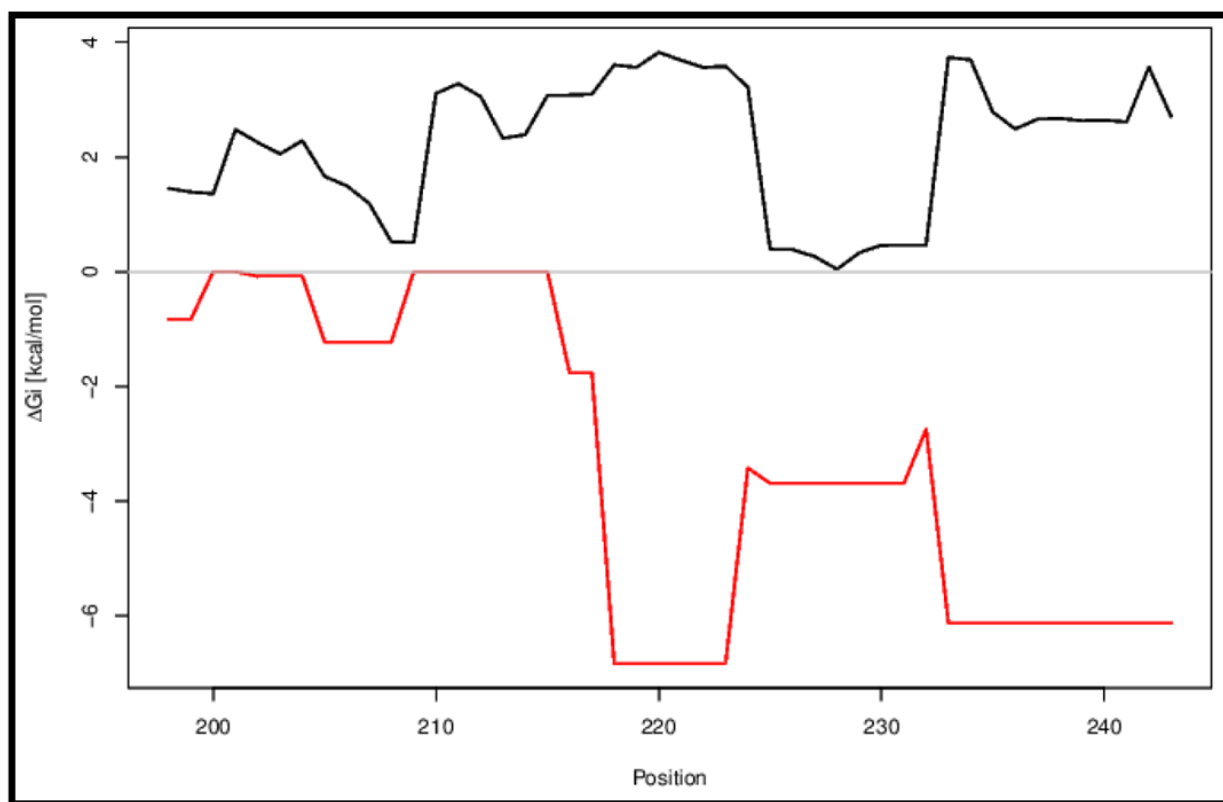

**Supplementary figure S13:** Showing interaction between lncRNA RP11-773H22.4 and hsa-miR-4257 is thermodynamically favorable that was performed by The Vienna RNA Website. The plot below shows the interaction free energy (RED)  $G_i$  and the energy needed to open existing structures in the longer sequence (BLACK) for the target region (top) and the whole range (bottom).

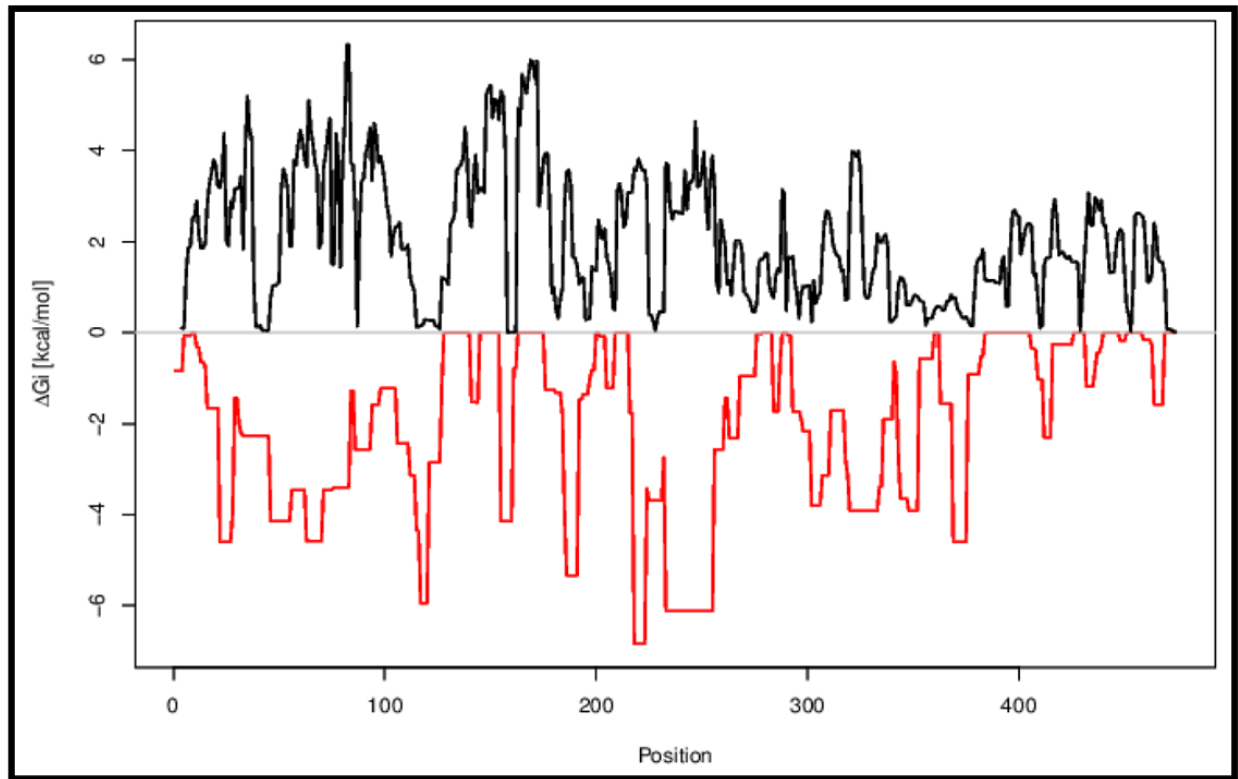

**Supplementary figure S14:** Showing interaction between lncRNA RP11-773H22.4 and hsa-miR-4257 is thermodynamically favorable that was performed by The Vienna RNA Website. Results have been computed using RNAup 2.4.18.
